# Supplementary material for: Mas Receptor Activation Slows Tumor Growth and Attenuates Muscle Wasting in Cancer
Source: Oxford University Press journal article supplement (doi:10.1158/0008-5472.can-18-1207), 2018-11-12
Supplement: 00085472can181207-sup-200471_2_supp_5130234_ph6rqw.doc [file 00085472can181207-sup-200471_2_supp_5130234_ph6rqw.doc]

**Mas receptor activation slows tumor growth and attenuates muscle wasting in cancer**

Kate T. Murphy1, Mohammed I. Hossain1, Kristy Swiderski1, Annabel Chee1, Timur Naim1, Jennifer Trieu1, Vanessa Haynes1, Suzannah J. Read1, David I. Stapleton1, Sarah M. Judge2, Jose G. Trevino3, Andrew R. Judge2, and Gordon S. Lynch1

1Centre for Muscle Research, Department of Physiology, The University of Melbourne, Victoria 3010, Australia.

2Department of Physical Therapy, University of Florida Health Science Center, Gainesville FL 32610, USA.

3Department of Surgery, College of Medicine, University of Florida Health Science Center, Gainesville FL 32610, USA.s

**Correspondence to:** Kate T. Murphy, Ph.D.

Centre for Muscle Research

Department of Physiology

The University of Melbourne

Victoria 3010 Australia

Ph: +61 3 8344 3672

Fax: +61 3 8344 5818

Email: [ktmurphy@unimelb.edu.au](mailto:ktmurphy@unimelb.edu.au)

**Running title:** Mas receptor activation attenuates cancer cachexia

**Keywords:** Renin-Angiotensin System, Mas receptor, cancer cachexia, anti-tumor

**Conflict of interest statement:** The authors declare no potential conflicts of interest.

**Supplemental Methods**

**Production of AT1 and MasR recombinant adeno-associated virus (rAAV) vectors**

cDNA constructs encoding for AT1 and MasR were cloned into the *SacII/HindIII* locus of an rAAV6 expression plasmid containing the cytomegalovirus (CMV) immediate early enhancer and promoter, flanking inverted terminal repeats, and an SV40 polyA sequence , using standard cloning techniques. The primers with the restriction sites are shown in Supplemental Table S1. The constructs were sent to Penn Vector Core (PA, USA) for generation of the rAAV9 viral preparations.

***In vivo* viral vector study**

Twelve-week-old male healthy CD2F1 (Balb/c  DBA) mice were anesthetized via an *i.p.* injection of a mixture of ketamine (100 mg.kg-1) and xylazine (10 mg.kg-1), such that they were unresponsive to tactile stimuli. Both hindlimbs were shaved and a small portion of each tibialis anterior (TA) muscle surgically exposed. The right TA muscle was injected with 1×109 vector genomes (determined in a dose-response experiment to be optimal for inducing overexpression of AT1 and MasR *in vivo*) of rAAV vectors for AT1 (rAAV9:AT1) or MasR (rAAV9:MasR)and the left TA muscle was injected with an equivalent dose or a vector lacking a functional gene (referred to as empty) in 40 µl of sterile Hank’s buffered saline solution (HBSS). The skin incision was closed with Michel clips (Aesculap, Tuttlingen, Germany) and the mouse allowed to recover on a heating pad. Mice were given a *s.c.* injection of atipamezole (Antisedan; 1 mg.kg-1) and a *s.c.* injection of buprenorphine (0.05 mg.kg-1; Lyppard Australia, Beverley, SA, Australia) for analgesia. Three weeks post-injection, mice were anesthetized with sodium pentobarbitone (Nembutal; 60 mg.kg-1) via *i.p.* injection and the TA muscles were excised, tendons removed, blotted on filter paper, weighed on an analytical balance, mounted in embedding medium and frozen in thawing isopentane. Samples were stored at -80ºC for subsequent analyses.

**Cloning of MasR gene into lentiviral vector**

The MasR gene was first amplified by PCR from kidney DNA and cloned into the *BamHI/NotI* and *NotI/EcoRI* locus of the tetracycline (Tet)-inducible lentiviral vector, pLVX-Tight-Puro (Clontech, Mountain View, CA, USA). The sequences of the resultant constructs were verified by DNA sequencing reactions performed in the Department of Pathology, The University of Melbourne.

**Culture of HEK 293FT cells**

The HEK 293FT cells (Invitrogen, Carlsbad, CA, USA) used for the production of lentivirus were grown in DMEM supplemented with 10% (v/v) FBS, 2 mM L-glut, 1 mM sodium pyruvate, 1 mM non-essential amino acids (GibcoTM, Thermo Fisher Scientific, Waltham, MA, USA) and 100 U/ml penicillin–streptomycin and incubated at 37°C + 5% CO2.

**Production of inducible lentivirus**

Lentivirus was generated by transfecting HEK 293FT cells with mixtures containing three plasmids and lipofectamine 2000 (Invitrogen) according to the manufacturer’s instruction. Briefly, 2.5 μg of pMD2.G (Addgene, Cambridge, MA, USA) and 6.5 μg of psPAX2 (Addgene) were mixed with either 3 μg of pLVX-Tight-Puro (containing AT1 or MasR gene) or pLVX-Tet-On Advanced (Clontech, Mountain View, CA, USA). Each of the mixtures was diluted with 1.5 ml Opti-MEM (reduced serum) (GibcoTM) and incubated for 5 min at room temperature (RT). Diluted lipofectamine 2000 (36 μl lipofectamine + 1.5 ml Opti-MEM) was added to each of the mixtures and incubated for 20 min. HEK 293FT cells (70-80 % confluence) were then transfected with mixtures containing either pLVX-Tight-Puro or pLVX-Tet-On-Advanced to generate response and regulator viruses, respectively. The media was replaced with fresh media after 18-20 h of transfection. The viruses were collected at 24 and 48 h time points and filtered through a 0.22 μm filter. Filtrates were placed in 50 ml tubes containing Opti-prep (~4 ml) (Sigma-Aldrich) and centrifuged at 50,000  g at 4°C for 2 h using a SW32Ti rotor (Beckman-Coulter, Brea, CA, USA). After centrifugation, a layer containing the lentiviral particles located between the media and Opti-prep was collected and placed in a 50 ml tube. A second centrifugation with DMEM was performed at 5,000  g overnight at 4°C to remove residual Opti-prep from the viral particles. The pelleted lentiviral particles were resuspended in ice-cold PBS (pH 7.4) and stored at -80°C. Lentivirus particles containing empty pLVX-Tight-Puro were also produced for control experiments.

**Generation of a specific anti-AT1 antibody**

Commercially available AT1 antibodies lack specificity and we found that one of these antibodies, sc-579, recognized an ~43 kDa band (indicated by arrow), corresponding to the predicted size of the native AT1 receptor, in quadriceps muscles and hearts from both wild type (WT) and AT1A-/- mice (Supplemental Fig. S8A). It did not detect increased expression in TA muscles injected with rAAV9:AT1 compared with those injected with an equivalent dose of empty control vector (Supplemental Fig. S8A). Furthermore, many bands not corresponding to the appropriate native AT1 molecular size were detected (Supplemental Fig. S8A). We therefore sought to generate a specific anti-AT1 antibody and the resulting peptide antibody, D15136-1-5, detected an ~43 kDa band (indicated by arrow) in western blots (Supplemental Fig. S8B). Specificity of D15136-1-5 was confirmed by the presence of a band at ~43 kDa in quadriceps muscles and hearts from WT but not AT1A-/- mice, as well as increased expression of the band in TA muscles injected with rAAV9:AT1 compared with those injected with an equivalent dose of empty control vector (Supplemental Fig. S8B). Very few bands not corresponding to the appropriate native AT1 molecular size were detected (Supplemental Fig. S8B). These findings revealed that our anti-AT1 antibody D15136-1-5 had greater specificity for AT1 than commercially available anti-AT1 antibodies and was therefore used in all subsequent experiments.

**Western blot analyses**

Western blotting of muscle samples and cells was performed as described previously . Membranes were incubated overnight at 4ºC with the following primary antibodies (all 1:1,000 in 5% BSA/PBS/0.5% Tween-20): anti-AT1 (#D15136-1-5, Abmart, described above); MasR (#AAR-013, Jomar Biosciences, Welland, SA, Australia); p-Akt (Ser473; #9271, Cell Signaling Technology, Danvers, MA); total Akt (#9272, Cell Signaling); p-mTOR (Ser2448; #2971, Cell Signaling); total mTOR (#2972, Cell Signaling); fast myosin heavy chain (MyHC, #ab51263, Abcam, Cambridge, MA, USA); tubulin (Sigma-Aldrich) or anti-puromycin (Millipore, Kilsyth, VIC, Australia). The following day, membranes were incubated for 1 h at RT with horseradish peroxidase (HRP) conjugated goat anti-rabbit IgG secondary antibody (#NA9340V, GE HealthCare, Little Chalfont, UK, diluted 1:5,000 in 5% BSA/PBS/0.5% Tween-20) or goat anti-mouse IgGFc2a secondary antibody for puromycin (diluted 1:50,000 in 5% milk/TBST). The signal was imaged using a ChemiDoc XRS machine (Bio-Rad, Hercules, CA, USA) and blots or puromycin ‘smear’ were quantified using Image Lab software (Bio-Rad). A total protein stain (BLOT-FastStainTM, G-Biosciences, St Louis, MO, USA) was performed by incubating membranes in Fixer for 3 min at RT, and then in Developer for 1 min at RT followed by 30 min at 4ºC.

**MasR overexpression and pharmacologic activation of the Ang-(1-7)/MasR axis in serum starved myotubes**

For MasR overexpression, the MasR gene was first amplified by PCR from kidney DNA and cloned into the *SacII/HindIII* locus of the rAAV expression plasmid containing the cytomegalovirus (CMV) immediate early enhancer and promoter, flanking inverted terminal repeats, and an SV40 polyA sequence (4) using standard cloning techniques. Using Lipofectamine 3000 (ThermoFisher Scientific, Waltham, MA, USA), C2C12 myoblasts were transfected with either the control GFP plasmid (rAAV-CMV-eGFP; kindly provided by Prof. J. Chamberlain, University of Washington, Seattle, USA) or the MasR plasmid, grown to confluence in DMEM/10% FBS/1% L-glut then differentiated into myotubes in DMEM/2% HS/1% L-glut for 4 d. On day 4 of differentiation, myotubes were incubated for 48 h at 37ºC + 5% CO2 in HS or serum-free DMEM (serum starved). Following incubation, cells were fixed and taken for immunocytochemical analysis of cell diameter.

For pharmacologic Ang-(1-7)/MasR activation, C2C12 myotubes that had been differentiated for 4 d were incubated for 48 h at 37ºC + 5% CO2 in HS or serum-free DMEM (serum starved) without (control) or with Ang-(1-7) (H-1715, 1 µM, Bachem), vehicle control (1% DMSO, Sigma-Aldrich) or AVE 0991 (10 nM, MasR agonist, MedChem Express, Monmouth Junction, NJ, USA). Following incubation, some cells were fixed and taken for immunocytochemical analysis of cell diameter. For other cells, puromycin was added to the media exactly 30 min before cells were collected in ice-cold homogenizing buffer and analyzed by western blotting.

**Protein quantification and trypsin digestion**

The total protein content of whole cell lysates and acetone precipitated protein pellets was determined using the DC Protein Assay Kit (Bio-Rad) based on the modified Lowry method with bovine serum albumin as standard . The protein pellets were redissolved in 100 μl of 50 mM n-octyl-β-D-glucopyranoside, triethyl ammonium bicarbonate (TEAB, Sigma-Aldrich) containing 8 M urea (Sigma-Aldrich). The DC assay was carried out according to the manufacturer’s instructions using a 96-well microtiter plate reader (Multiskan Spectrum, Thermo Fisher Scientific). One hundred micrograms of protein from each sample was transferred to a new Eppendorf tube and incubated with 1 mM Tris (2-carboxyethyl) pepsin (TCEP, Sigma-Aldrich) at 37°C for 1 h to reduce disulphide bonds. The samples were further incubated with 55 mM iodoacetamide (Sigma-Aldrich) at 37°C for 1 h in the dark to alkylate free sulfhydryl groups on the cysteine residues. Each of the sample mixtures was diluted to 1 M urea by the addition of 25 mM TEAB followed by overnight digestion with sequencing grade trypsin at 37°C.

**Purification of digested samples**

The digested samples were acidified with 1% (v/v) formic acid (Merck, Darmstadt, Germany) to quench the reaction and purified by a solid-phase extraction method using SPE (Sample Extraction Products) cartridges (Waters, Milford, MA, USA). Cartridges were first washed with 1 ml of 80% acetonitrile (ACN, Merck) containing 0.1% trifluoroacetic acid (TFA, Sigma-Aldrich). Two additional washes were performed with 1.2 ml of 0.1% TFA. The digested samples were then loaded and allowed to pass through the cartridges. The cartridges were washed twice with 1.5 ml of 0.1% TFA. Elution of the peptides were performed with 800 µl of 80% ACN containing 0.1% TFA. The eluted samples were vacuum centrifuged to remove partial ACN using Micro-senvac (N-Biotek, Gyeonggi-do, Korea) and freeze-dried (Bell Biotechnology, Auckland, NZ) overnight prior to dimethyl labeling.

**Dimethyl labelling**

Dimethyl labeling of peptides was performed according to the methods described by Boersema *et al* . Briefly, the trypsin digested peptide mixtures, +28.0313, [4%, v/v]) and deuterated (medium) formaldehyde (CD2O, +32.0564, [4%, v/v]), respectively. After a brief vortex and spin, 4 μl of freshly prepared 0.6 M sodium cyanoborohydride (NaBH3CN, Fluka, Buchs, Switzerland) solution was added to each of the light and medium labeled samples and incubated for 1 h at room temperature in a shaker to start the reaction. The reaction was terminated by the addition of 16 μl of ammonia (1%, v/v). Eight microliters of formic acid (5%, v/v) was added to each of the samples, while on ice, to consume the excess amount of labeling reagents. Finally, the light- and medium-labeled samples were mixed at ratio of 1:1 and analyzed by LC-MS/MS.

**Nano LC-MS/MS for protein identification**

LC-MS/MS analysis of labeled samples was conducted on an LTQ Orbitrap Elite (Thermo Fisher Scientific) mass spectrometer with a nanoelectrospray (Nano ESI) coupled to an Ultimate 3000 RSLC nanosystem (Dionex). The nanoLC system was equipped with an Acclaim Pepmap nano-trap column (Dionex C18, 2 µm, 100 Å, 75 µm  2 cm) and an Acclaim Pepmap analytical column (Dionex C18, 2 µm, 100 Å, 75 µm  15 cm ) running on a 3–80% CH3CN-containing 0.1% formic acid gradient over 25 min. The LTQ Orbitrap Elite mass spectrometer was operated in the data-dependent mode with Nano ESI spray voltage of +2.0 kV, capillary temperature of 250°C and S-lens RF value of 60%. In this mode, spectra were acquired first in positive mode (FT mode at 240,000 resolutions) with complete scan (the *m/z* range of 300–1650), followed by either collision-induced dissociation (CID) or high-energy collisional dissociation (HCD) at 15,000 resolutions. Ten of the most intense peptide ions with charge states ≥2 were isolated and fragmented using normalized collision energy of 35 and activation Q of 0.25 (CID) or activation times of 0.1 ms (HCD).

**Quantification**

The Orbitrap MS data were analyzed using Proteome Discoverer (Thermo Fisher Scientific version 1.4) with the Mascot search engine (Matrix Science version 2.4) against the Uniprot database (currently containing 26,617,536 sequences) with mouse (*Mus musculus*) sequences. The search parameters were set as follows: precursor mass tolerance of 20 ppm, fragment mass tolerance of 0.2 Da, carbamidomethyl (C) of cysteinas fixed modification while dimethyl labeling (CH2O and CD2O) at the peptide N-terminus and lysine as variable modifications. Trypsin with no missed cleavages was used as the cleavage enzyme. Search results were set to a maximum of 1% false discovery rate (FDR). In addition, proteins repeatedly appearing in four experimental replicates were considered for further analysis. Quantification of the dimethyl-labeled peptides was conducted using the Quant node on Proteome Discoverer. The Kyoto Encyclopedia of Genes and Genomes (KEGG) database was used to annotate the protein pathways altered with AVE 0991 treatment .

**Colon-26 (C-26) mouse model of cancer cachexia**

Frozen C-26 cells were kindly donated by Prof. Martha Belury (The Ohio State University, Columbus, OH, USA). The procedures for thawing and counting cells and assessments of the functional and metabolic impairments in severely cachectic C-26 tumor-bearing mice has been described by us in detail elsewhere . Twelve-week-old male CD2F1 mice were allocated randomly into one of two experimental groups: a C-26 tumor-bearing group fed *ad libitum* (*n*=7) and a control group injected with PBS alone and pair-fed to the tumor-bearing mice (*n*=7). On the day of inoculation, all mice were anesthetized via an intraperitoneal (*i.p.*) injection of a mixture of ketamine (100 mg.kg-1) and xylazine (10 mg.kg-1; VM Supplies, Chelsea Heights, VIC, Australia), such that they were unresponsive to tactile stimuli. Mice were shaved on the dorsal side and given a *s.c.* injection of either 0.5  106 C-26 cells suspended in 100 μl of sterile PBS or 100 μl of sterile PBS only. Mice recovered from anesthesia on a heat pad and were given a subcutaneous (*s.c.*) injection of atipamezole (Antisedan; 1 mg.kg-1; VM Supplies) to partially reverse the effects of xylazine and promote faster recovery from sedation. After 21 days, mice were anesthetized with sodium pentobarbitone (Nembutal; 60 mg.kg-1; Sigma-Aldrich) via *i.p.* injection and the gastrocnemius muscle from the right hindlimb was carefully excised, tendons removed, blotted on filter paper, weighed on an analytical balance, snap frozen in liquid nitrogen and stored at -80ºC for subsequent analysis of AT1 and MasR protein expression.

**MasR overexpression and pharmacologic Ang-(1-7)/MasR activation in C2C12 myotubes co-cultured with cancer cells**

For MasR overexpression, C2C12 myoblasts were transfected using Lipofectamine 3000 with either the control GFP plasmid or the MasR plasmid, grown to confluence in DMEM/10% FBS/1% L-glut and then differentiated into myotubes in DMEM/2% HS/1% L-glut. On day 4 of differentiation, C2C12 cells were incubated in fresh DMEM/2% HS/1% L-glut without or with vehicle (1% DMSO) or AVE 0991 (10 nM) and cell culture inserts (Labware, Carlsbad, CA, USA) with a pore size of 1.0 µM were carefully placed into each well of a 12-well cell culture plate. Approximately 500 µl of RPMI without (control) or containing 2.5 × 105 C-26 cells (kindly donated by Prof. Martha Belury, The Ohio State University, Columbus, OH, USA) were added directly into the insert and incubated for 48 h at 37ºC + 5% CO2, after which the C2C12 cells were fixed for immunocytochemical analysis of cell diameter.

To assess whether pharmacologic Ang-(1-7)/MasR activation could prevent or attenuate cancer-induced muscle atrophy, differentiated C2C12 myotubes were incubated in fresh DMEM/2% HS/1% L-glut containing vehicle (1% DMSO), Telmisartan (30 µM, Sigma-Aldrich), AVE 0991 (10 nM) or both Telmisartan and AVE 0991 (30 µM, 10 nM) and at the same time, cell culture inserts containing: 500 µl of RPMI without or with C-26 cells; or 500 µl of DMEM/10% FBS without or containing 2.5 × 105 Lewis Lung Carcinoma (LLC) cancer cells (ATCC) were placed in each well as described above. Cells were then incubated for 48 h at 37ºC + 5% CO2. Following incubation, cells were fixed for immunocytochemical analysis of cell diameter or lysed for Real-Time RT-PCR.

To assess whether pharmacologic Ang-(1-7)/MasR activation could reverse existing cancer-induced atrophy, C2C12 myotubes that had been differentiated for 4 d were co-cultured with or without C-26 cancer cells for a further 24 or 48 h at 37ºC + 5% CO2. In some experiments, after 24 h co-culture, myotubes were fixed for immunocytochemical analysis of cell diameter to determine the extent of cancer-induced wasting. In other experiments, after 24 h of co-culture, vehicle (1% DMSO) or AVE 0991 (10 nM) was added to the C2C12 cells and co-culture continued for another 24 h at 37ºC + 5% CO2. At 48 h after co-culture was initiated, myotubes were fixed for immunocytochemical analysis of cell diameter.

To determine whether increasing miR-23a-3p could reduce the protective effect of AVE 0991 for C-26 induced atrophy, C2C12 myoblasts were transfected using Lipofectamine RNAiMAX (ThermoFisher Scientific) with either mouse miRNA mimic negative control or miR-23a-3p mimic (Applied Biological Materials, Richmond BC, Canada) grown to confluence in DMEM/10% FBS/1% L-glut and then differentiated into myotubes in fresh DMEM/2% HS/1% L-glut. On day 4 of differentiation, C2C12 cells were incubated in fresh DMEM/2% HS/1% L-glut with vehicle (1% DMSO) or AVE 0991 (10 nM) and at the same time cell culture inserts containing RPMI were co-cultured with C-26 cells for 48 h, after which the C2C12 cells were fixed for immunocytochemical analysis of cell diameter.

**Real-Time RT-PCR analyses**

Total RNA was extracted from 10-20 mg of muscle using a commercially available kit according to the manufacturer’s instructions (PureLink RNA Mini Kit, Invitrogen). RNA concentration was determined spectrophotometrically using a NanoDrop 2000 (Thermo Scientific, Wilmington, DE, USA) at 260 nm, and the samples were stored at -80˚C. RNA was transcribed into cDNA using the Invitrogen SuperScriptTM VILO cDNA Synthesis Kit, and the resulting cDNA stored at -20˚C for subsequent analysis. Real-Time RT-PCR was carried out with the Bio-Rad CFX384 Touch Real-Time PCR Detection System (Bio-Rad) using the ssoAdvanced SYBR Green Supermix (Bio-Rad). Measurements included a no template control as well as an RT negative control. Primer sequences for troponin C fast, troponin C slow, MuRF-1, atrogin-1, Smad3, caspase3, MHCIIa, MHCIIx and MHCIIb were as detailed previously and the forward and reverse sequences for mouse troponin I fast were: 5’-ACGTGGCTGAAGAGGAGAAA-3’ and 5’-CTCTTGAACTTGCCCCTCAG-3’; mouse troponin I slow: 5’-GCACTTTGAGCCCTCTTCAC-3’ and 5’-CCTGAAGGGCACTGAGAGAC-3’; and mouse TGF-β1 were: 5’-TGAGTGGCTGTCTTTTGACG-3’; and 5’-TCTCTGTGGAGCTGAAGCAA-3’, respectively. For the human cancer cachexia study, the AT1 and MasR primers (assay ID Hs00258938_m1 and Hs00267157_s1, respectively) was obtained from ThermoFisher Scientific (Waltham, MA, USA) and values were normalized to 18S mRNA expression. The content of single-stranded DNA (ssDNA) in each sample was determined using the Quanti-iT OliGreen ssDNA Assay Kit (Molecular Probes, Eugene, OR), as described previously . Gene expression was quantified by normalizing the logarithmic cycle threshold (CT) value (2–CT) to the cDNA content of each sample to obtain the expression 2–CT/cDNA content (ng.ml-1).

**Supplemental References**

1. Winbanks CE, Murphy KT, Bernardo BC, Qian H, Liu Y, Sepulveda PV*, et al.* Smad7 gene delivery prevents muscle wasting associated with cancer cachexia in mice. Sci Transl Med 2016;8:348ra98.

2. Benicky J, Hafko R, Sanchez-Lemus E, Aguilera G, Saavedra JM. Six commercially available angiotensin II AT(1) receptor antibodies are non-specific. Cellular and Molecular Neurobiology 2012;32:1353-65.

3. Murphy KT, Koopman R, Naim T, Léger B, Trieu J, Ibebunjo C*, et al.* Antibody-directed myostatin inhibition in 21-mo-old mice reveals novel roles for myostatin signaling in skeletal muscle structure and function. FASEB J 2010;24:4433-42.

4. Ham DJ, Caldow MK, Lynch GS, Koopman R. Arginine protects muscle cells from wasting in vitro in an mTORC1-dependent and NO-independent manner. Amino Acids 2014;46:2643-52.

5. Murphy KT, Chee A, Gleeson BG, Naim T, Swiderski K, Koopman R*, et al.* Antibody-directed myostatin inhibition enhances muscle mass and function in tumor-bearing mice. Am J Physiol 2011;301:R716-R26.

6. Murphy KT, Ham DJ, Church JE, Naim T, Trieu J, Williams DA*, et al.* Parvalbumin gene transfer impairs skeletal muscle contractility in old mice. Hum Gene Ther 2012;23:824-36.

7. Lowry OH, Rosebrough NJ, Farr AL, Randall RJ. Protein measurement with the Folin phenol reagent. Journal Biol Chem 1951;193:265-75.

8. Boersema PJ, Raijmakers R, Lemeer S, Mohammed S, Heck AJ. Multiplex peptide stable isotope dimethyl labeling for quantitative proteomics. Nature Protocols 2009;4:484-94.

9. Kanehisa M, Goto S. KEGG: kyoto encyclopedia of genes and genomes. Nucleic Acids Research 2000;28:27-30.

10. Murphy KT, Chee A, Trieu J, Naim T, Lynch GS. Importance of functional and metabolic impairments in the characterization of the C-26 murine model of cancer cachexia. Dis Model Mech 2012;5:533-45.

**
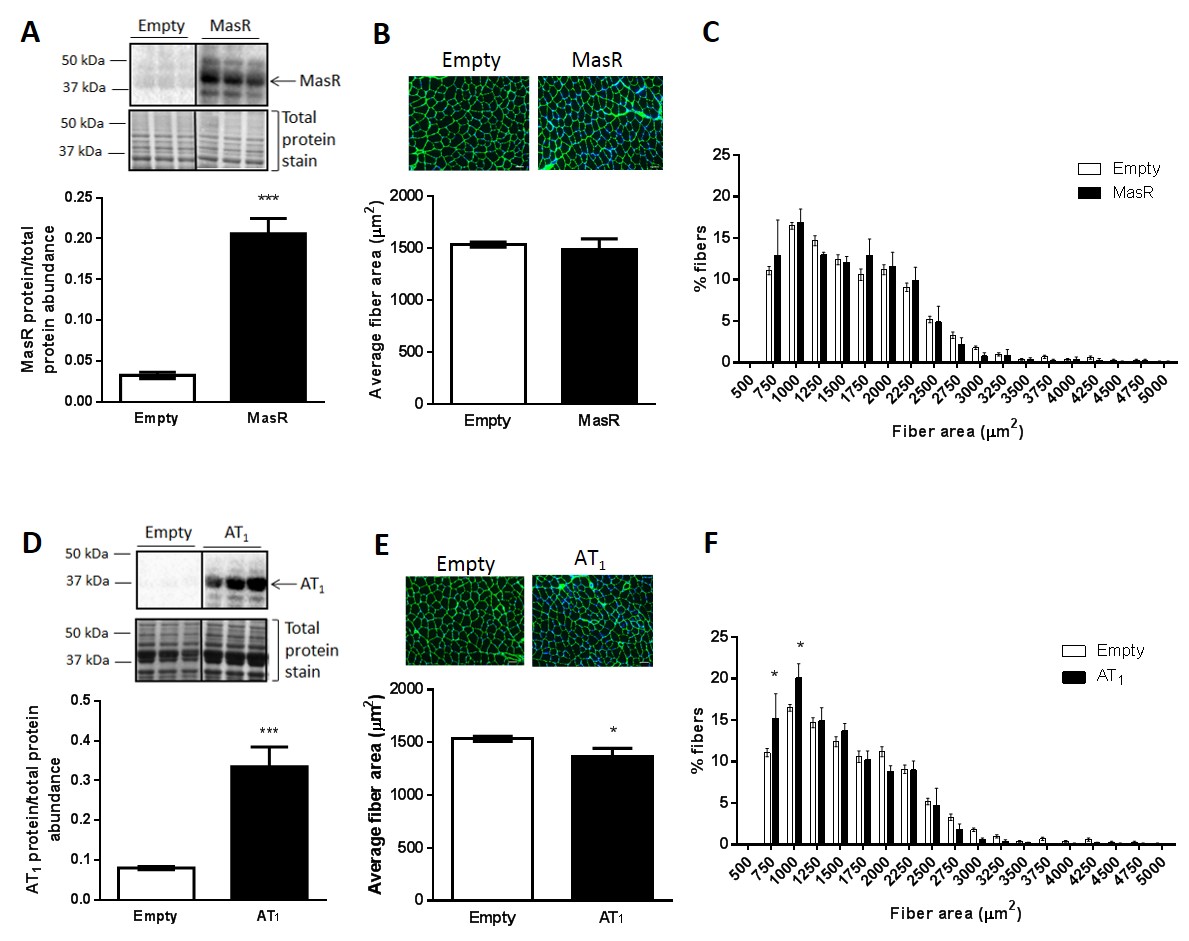
**

**Supplemental Figure S1.** Muscle-specific overexpression of the AT1 but not the MasR regulates skeletal muscle fiber size in healthy mice. Mouse TA muscles were injected intramuscularly with rAAV9:Empty (Control) or (A-C) rAAV9:MasR or (D-F) rAAV9:AT1 and examined at 21 days after injection. Western blot of (A) MasR and (D) AT1 and corresponding quantification in mouse TA muscles (unpaired *t* test; ****P*<0.001 vs. Empty; Empty, *n* = 10; MasR, *n* = 5; AT1, *n* = 5, ± SEM)*.* (B, E) TA muscle cross-sections were reacted for laminin to assess average muscle fiber cross-sectional area with a (C, F) histogram showing fiber size proportions (B & E, unpaired *t* test; C & F, two-way ANOVA; **P*<0.05 vs. Empty; Empty, *n* = 6; MasR, *n* = 3; AT1, *n* = 3, ± SEM). Using a 20× objective, total magnification for images in Figure 1, B and E is 126×. Scale bar = 50 µm.


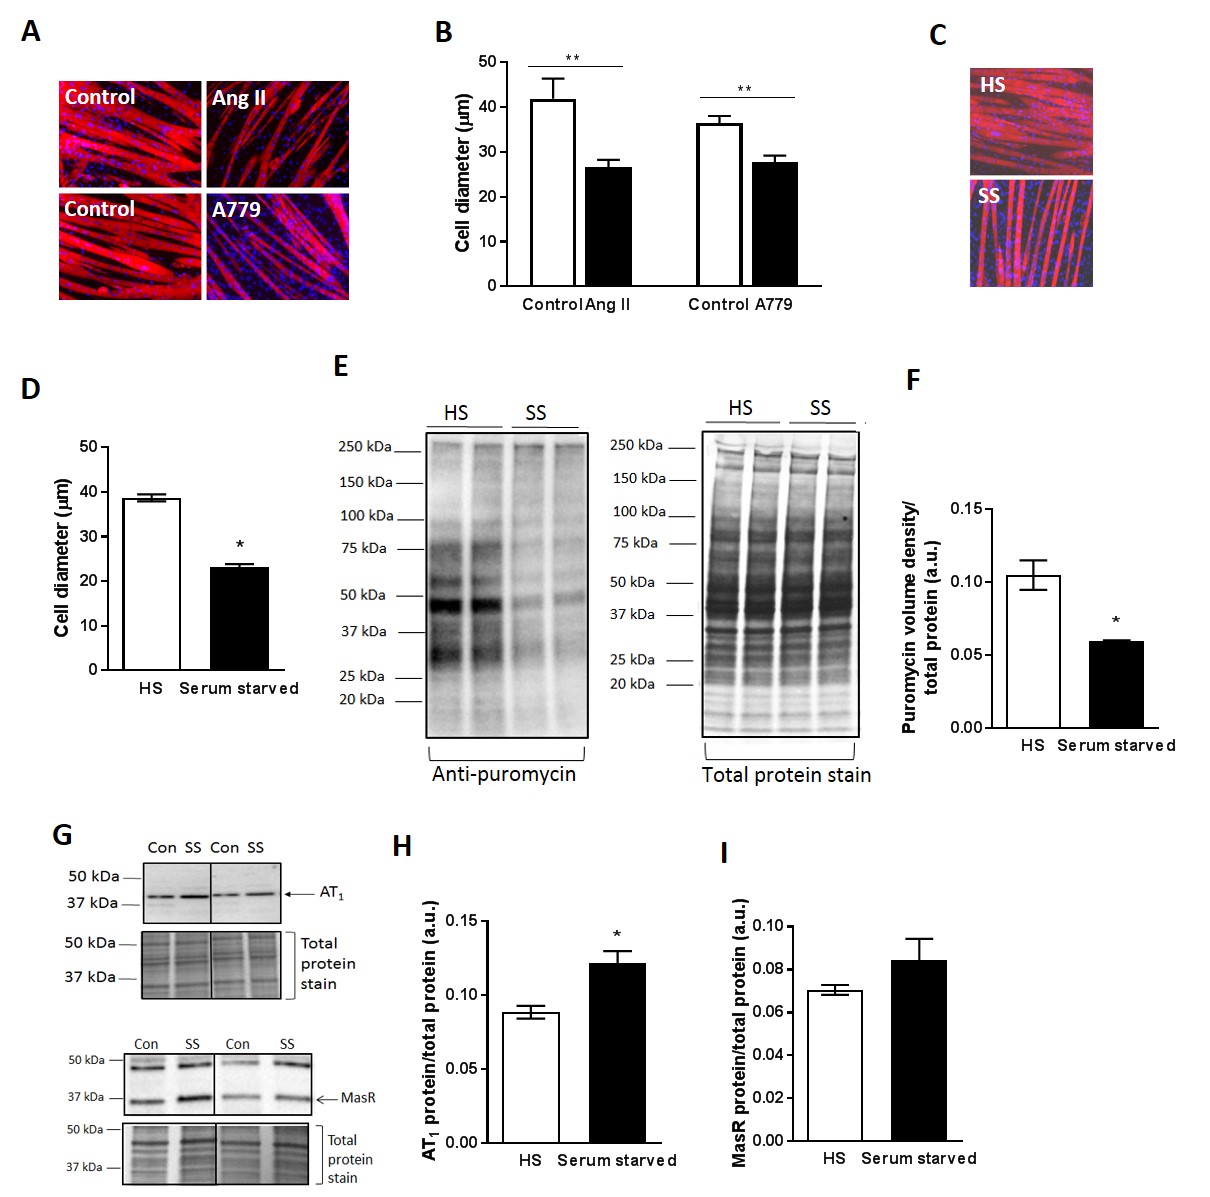


**Supplemental Figure S2.** (A) Representative images of differentiated C2C12 myotubes incubated for 48 h in normal horse serum and treated with vehicle control or the ACE/Ang II/AT1 axis activators Ang II (H-1705, 1 μM) or A779 (1 μM) and then fixed and stained for myosin (*red*) with nuclei visualized using DAPI (*blue*). (B) Ang II and A779 reduces cell diameter of myotubes (unpaired *t* test; ***P*<0.01 vs. Control; *n* = 8, ± SEM). (C) Representative images of differentiated C2C12 myotubes incubated for 48 h in normal horse serum (HS, control) or serum-free DMEM (serum starved, SS) and then fixed and stained for myosin and DAPI. (D) Serum starvation for 48 h reduces cell diameter of C2C12 myotubes (unpaired *t* test; **P*<0.05 vs. HS; HS, *n* = 4; Starved, *n* = 3, ± SEM). (E) Representative western blots of puromycin stain (*left*) and total protein stain (*right*) and (F) corresponding quantification to assess protein synthesis in control and serum starved myotubes (unpaired *t* test; **P*<0.05 vs. HS; HS, *n* = 4; Starved, *n* = 3, ± SEM). (G) Representative western blots and corresponding quantification of (H) AT1 and (I) MasR protein expression in control and serum starved myotubes (unpaired *t* test; **P*<0.05 vs. HS; HS, *n* = 6; Starved, *n* = 5, ± SEM).


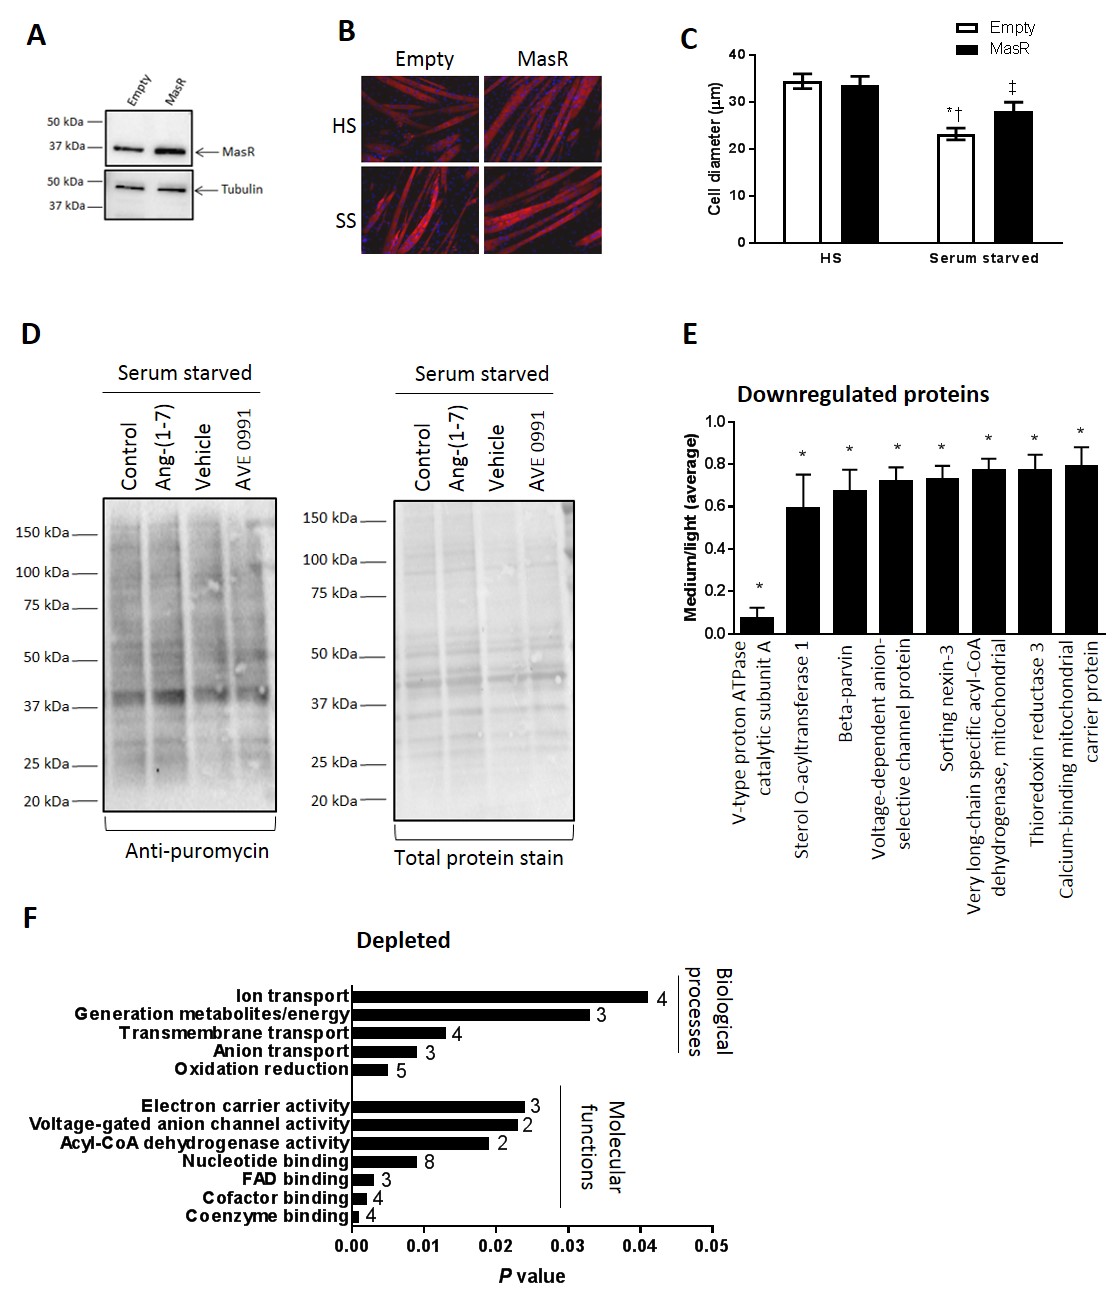


**Supplemental Figure S3.** (A) Genetic MasR overexpression was induced by transducing C2C12 myoblasts with a Tet-regulated MasRlentivirus or empty lentivirus and treating differentiated myotubes with doxycylin. (B, C) Doxycycline was added at the same time myotubes were incubated in normal horse serum (HS) or serum-free media (serum starved, SS) and cell diameter assessed after 48 h (two-way ANOVA; **P*<0.02 vs. HS + Empty; †*P*<0.05 vs. HS + MasR; ‡*P*<0.05 vs. Serum starved + Empty; *n* = 8, ± SEM). (D) Representative western blots of puromycin stain (*left*) and total protein stain (*right*) to assess protein synthesis in myotubes incubated for 48 h in serum free media and treated at the same time without (control) or with Ang-(1-7), DMSO vehicle or AVE 0991 (related to Figure 1J). (E) Downregulated proteins and (F) depleted biological processes and molecular functions representing down-regulated proteins obtained from DAVID database in AVE 0991 treated serum starved myotubes. Numbers next to solid bars in F indicates counts of proteins that are annotated to the indicated processes and functions (unpaired *t* test; **P*<0.05 Serum Starved + AVE 0991 vs. Serum Starved + DMSO; *n* = 3, ± SEM).

**
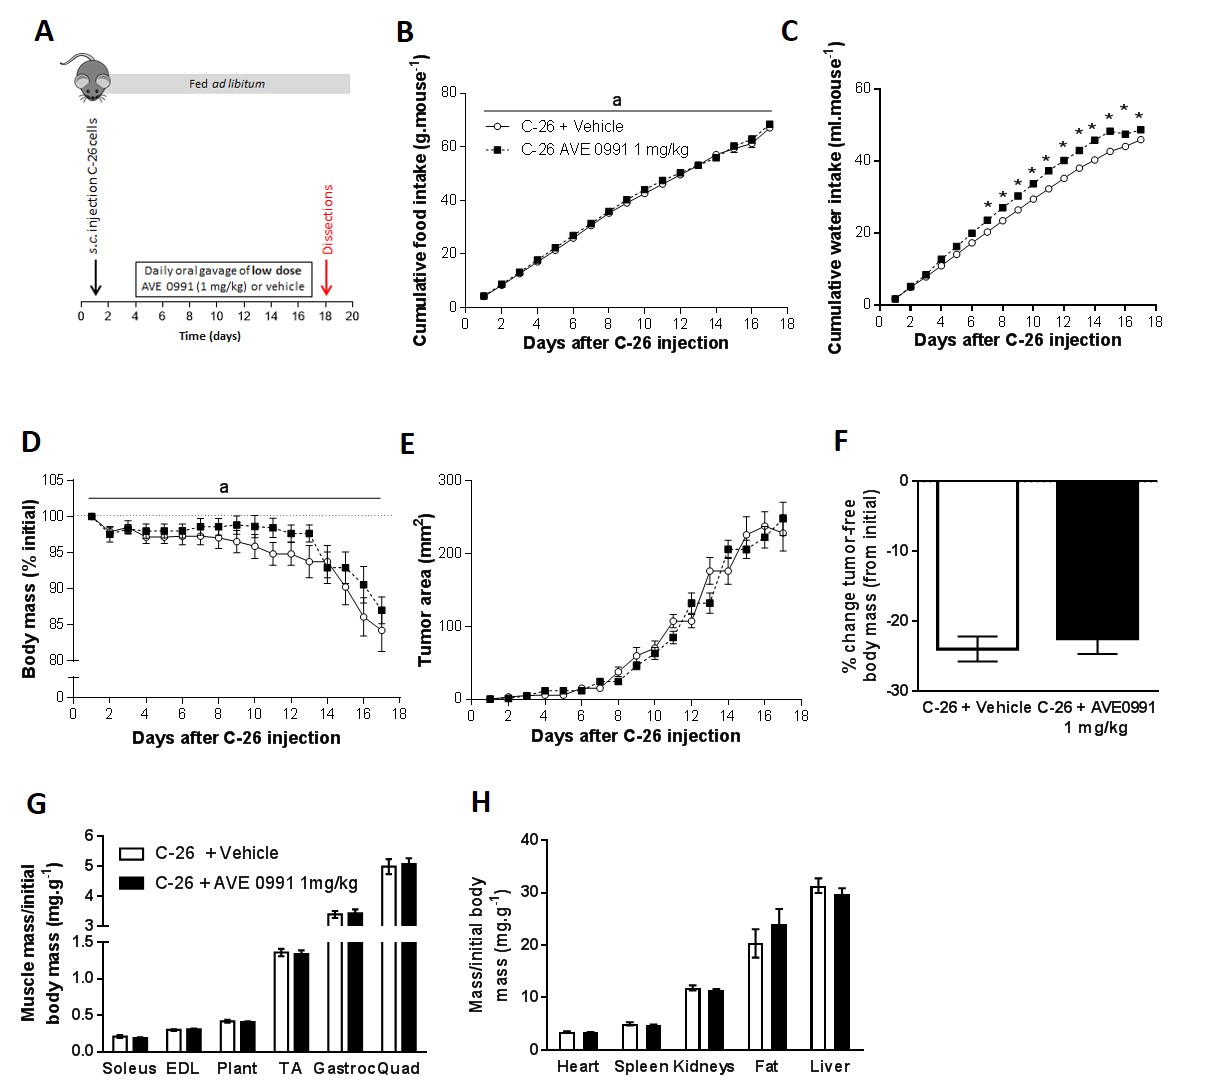
**

**Supplemental Figure S4.** Low dose AVE 0991 (1 mg/kg) induces small but significant improvements in food and water intake and weight loss in severely cachectic C-26 tumor-bearing mice. (A) Schematic of experimental timeline involving the treatment of C-26 tumor-bearing mice with low dose AVE 0991 (1 mg/kg) or vehicle control. (B) Daily cumulative food intake, (C) cumulative water intake, (D) relative body mass and (E) tumor area (two-way ANOVA; **P*<0.05 vs. C-26 + Vehicle; a*P*<0.02 treatment main effect, C-26 + AVE 0991 > C-26 + Vehicle; *n* = 4-8, ± SEM). At the end of the treatment period (day 18), the tumor was excised and weighed and (F) the percentage change in tumor-free body mass from initial (day 1) was calculated (unpaired *t* test; no significant differences were found; *n* = 8, ± SEM). Selected tissues were also excised, weighed and normalized to initial body mass: (G) soleus, extensor digitorum longus (EDL), plantaris (Plant), tibialis anterior (TA), gastrocnemius (Gastroc), quadriceps (Quad); and (H) heart, spleen, kidneys, epididymal fat and liver (unpaired *t* test; no significant differences were found; *n* = 8, ± SEM).

**
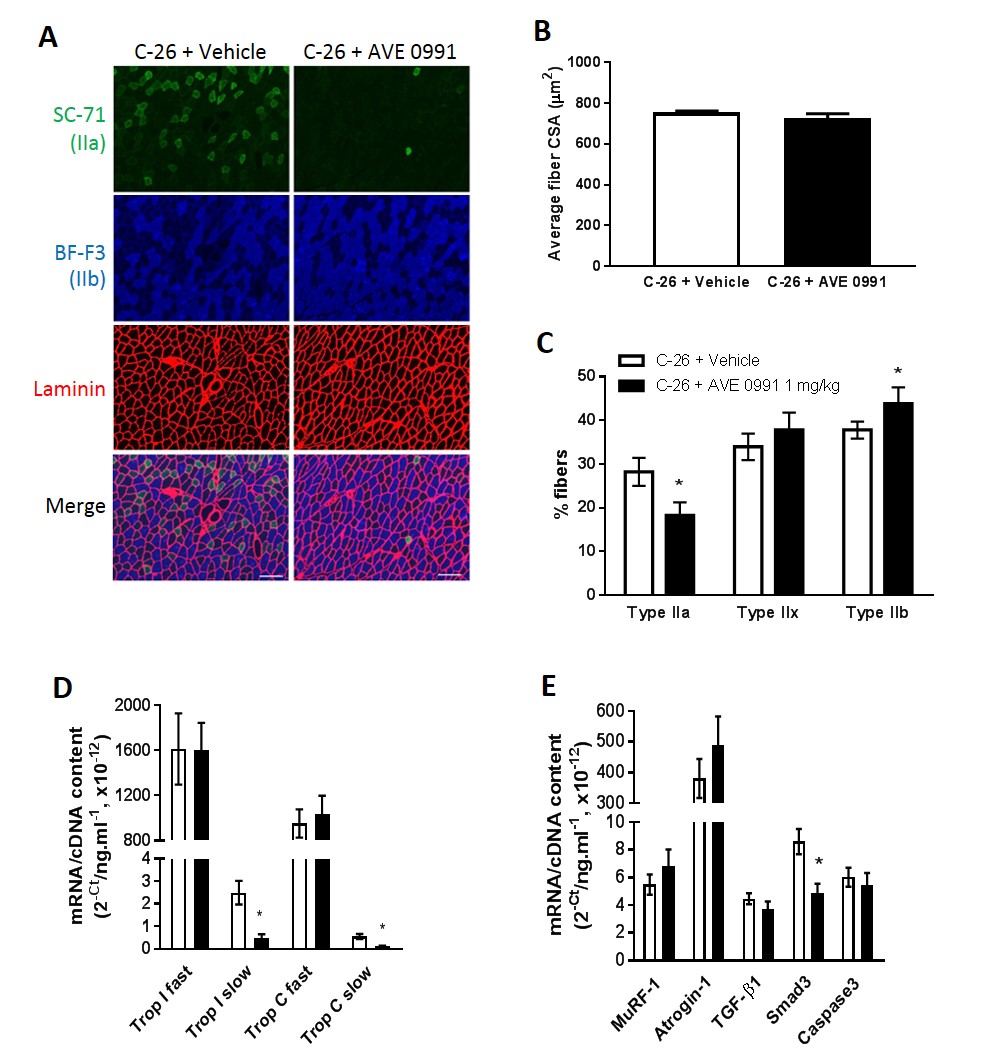
**

**Supplemental Figure S5.** Low dose AVE 0991 (1 mg/kg) causes an oxidative-to-glycolytic shift in fiber types in TA muscles from severely cachectic C-26 tumor-bearing mice. (A) Representative images of TA muscle cross-sections reacted for laminin (*red*) to indicate all muscle fibers and myosin IIa (SC-71, *green*) and myosin IIb (BF-F3, *blue*) to indicate type IIa and type IIb fibers, respectively. Since mouse TA muscles do not express detectable levels of type I fibers, fibers not reacting with SC-71 or BF-F3 (i.e. black fibers in the *merge*) were assumed to be type IIx fibers. (B) Quantification of laminin based on reaction intensity to facilitate assessment of average muscle fiber cross-sectional area (CSA) (unpaired *t* test; no significant differences were found between groups; *n* = 8, ± SEM). (C) Quantification of SC-71, BF-F3 and laminin based on reaction intensity facilitated determination of the proportion of type IIa, type IIb and type IIx fibers (non-reacting with SC-71 or BF-F3) (unpaired *t* test; **P*<0.05 vs. C-26 + Vehicle; *n* = 8, ± SEM). Gene expression of (D) the fast and slow isoforms of troponin I and troponin C, (E) the ubiquitin ligases MuRF-1 and atrogin-1, TGF-β1, Smad3 and caspase3 in TA muscles from vehicle or AVE 0991 treated C-26 tumor-bearing mice (unpaired *t* test; **P*<0.05 vs. C-26 + Vehicle; *n* = 8, ± SEM). Using a 20× objective, total magnification for image in Figure S5A is 126×. Scale bar = 50 µm.


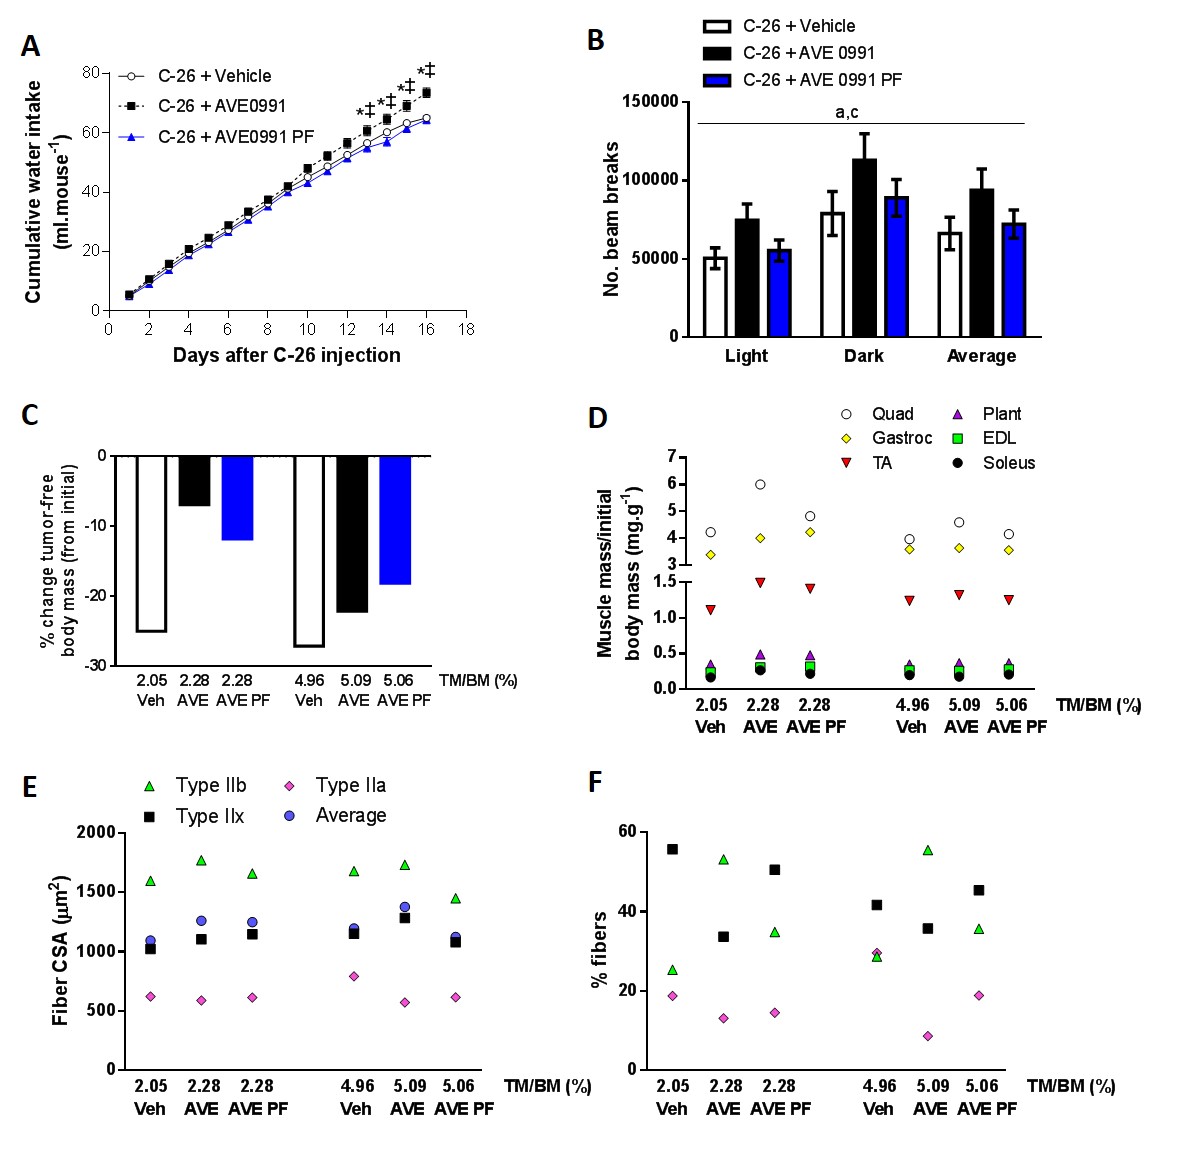


**Supplemental Figure S6.** High dose AVE 0991 (15 mg/kg) treatment enhanced (**A**) cumulative water intake and (**B**) movement as assessed by the number of beam breaks (x, y and z) over 12-h light and dark cycles and for the average of both cycles (24-h period) in severely cachectic C-26 tumor-bearing mice fed *ad libitum* but not in those pair-fed (PF) to vehicle treated controls (two-way ANOVA; **P*<0.05 C-26 + AVE 0991 vs. C-26 + Vehicle; ‡*P*<0.05 C-26 + AVE 0991 PF vs. C-26 + AVE 0991; a*P*<0.05 Treatment main effect C-26 + AVE 0991 vs. C-26 + Vehicle; C*P*<0.05 Treatment main effect C-26 + AVE 0991 PF vs. C-26 + AVE 0991; A, *n* = 4-16; B, *n* = 5-6, ± SEM). (**C**-**F**) The effect of high dose AVE 0991 (15 mg/kg) treatment on the loss of tumor-free body mass, muscle mass and muscle fiber-type size and proportion was assessed in a subset of mice *(n*=1/group*)* with similar tumor burden (tumor mass as a percentage of total end body mass, TM/BM) of: 2.05, 2.28 and 2.28% (low tumor burden) and 4.96, 5.09 and 5.06% (high tumor burden) for vehicle-treated mice and AVE 0991 treated mice fed *ad libitum* or pair-fed, respectively. Comparisons were made for: (**C**) the percentage change in tumor-free body mass from initial (day 1); (**D**) mass of skeletal muscles soleus, extensor digitorum longus (EDL), plantaris (Plant), tibialis anterior (TA), gastrocnemius (Gastroc), quadriceps (Quad); (**E**) the cross-sectional area (CSA) and (**F**) proportion of type IIa, type IIb and type IIx fibers (non-reacting with SC-71 or BF-F3) in TA muscles.


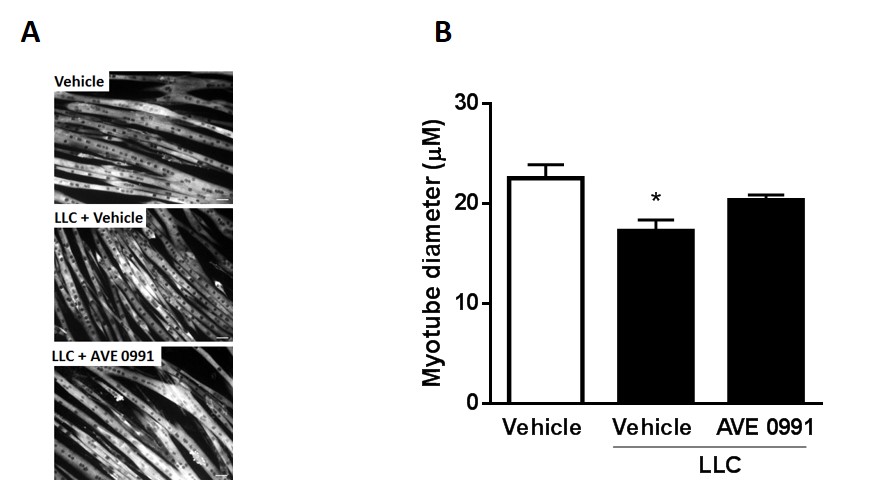


**Supplemental Figure S7.** Pharmacological Ang-(1-7)/MasR activation protects against Lewis Lung Carcinoma (LLC) cancer cell induced muscle fiber atrophy *in vitro*.(**A**, **B**)C2C12 myotubes were treated with vehicle (DMSO) or the MasR agonist AVE 0991 and at the same time were co-cultured with or without LLC cancer cells and assessed 48 h later for myotube diameter (one-way ANOVA; **P*<0.05 vs. Control + Vehicle; *n* = 4, ± SEM).


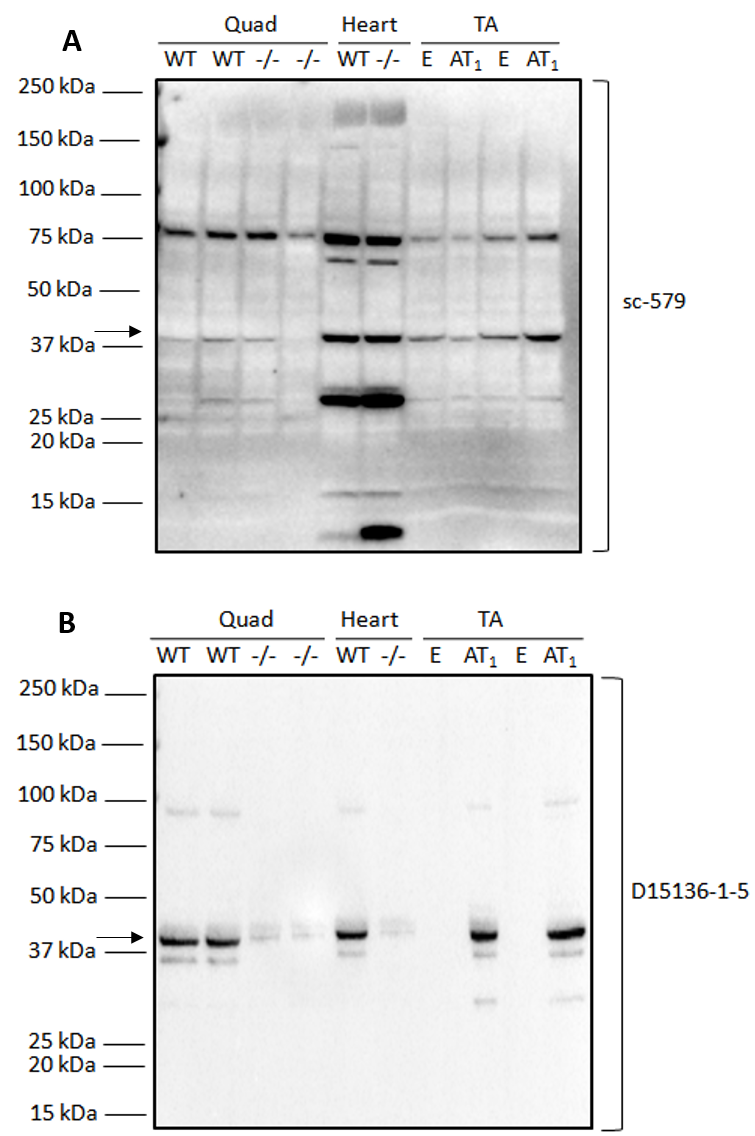


**Supplemental Figure S8.** Specificity of our custom anti-AT1 peptide compared to a commercially available anti-AT1 antibody. (A) Non-specificity of the commercially available anti-AT1 antibody sc-579 showing similar band intensity in quadriceps muscles (Quad) and hearts from wild type (WT) and AT­1A-/- mice (-/-), and similar band intensity in tibialis anterior (TA) muscles analyzed 21 days after the injection of 109 rAAV9:AT1 (AT1) compared with those injected with an equivalent dose of empty control vector (E). Note the presence of many bands not corresponding to the appropriate native AT1 molecular size (43 kDa, indicated by arrow). (B) Specificity of our custom anti-AT1 peptide (D15136-1-5) showing presence of a band at the native AT1 molecular size (43 kDa, indicated by arrow) in the quadriceps and heart of WT but not AT1A-/- mice, and increased expression of a band at ~43 kDa in TA muscles injected with rAAV9:AT1 compared with those injected with empty control vector. The scale on the left indicates the size in kDa according to the positions of the protein ladder.

**Supplemental Table S1.** Primers used to amplify AT1 and MasR genes

| Genes |  | Primers (5ʹ→3ʹ) | Restriction site |
| --- | --- | --- | --- |
| AT1 | Forward | CCGGGATCCATGGCCCTTAACTCTTCTACTGAAGATG | BamHI |
| Reverse | TCCGCGGCCGCTCACTCCACCTCAGAACAAGACGCA | NotI |
| MasR | Forward | TCCGCGGCCGCATGGACCAGTCAAATATGACATCCCTTG | NotI |
| Reverse | CCCGAATTCTCAGACCACAGTCTCAATGGATACAGTG | EcoRI |

**Supplemental Table** **S2.** Human cancer cachexia study group characteristics

| Group | | | | Sex (*n*) | Age (year) | BMI (kg/m2) | | % BW loss (in previous 12 months) |  | | | |
| --- | --- | --- | --- | --- | --- | --- | --- | --- | --- | --- | --- | --- |
| Control | | | | Female (6) | 59.2 ± 4.1 | 28.3 ± 2.0 | | 0.0 ± 0.0 |  | | | |
| Male (3) | 56.3 ± 6.3 | 31.1 ± 4.4 | | 0.0 ± 0.0 |  | | | |
| All (9) | 58.2 ± 3.3 | 29.2 ± 2.0 | | 0.0 ± 0.0 |  | | | |
| PDAC | | | | Female (7) | 74.6 ± 1.8 | 23.7 ± 1.5 | | 18.5 ± 3.6 |  | | | |
| Male (5) | 64.6 ± 3.9 | 27.1 ± 2.4 | | 17.5 ± 4.2 |  | | | |
| All (12) | 70.4 ± 2.4* | 25.1 ± 1.4 | | 18.1 ± 2.6* |  | | | |
| Student’s *t­-test* performed between All (males and females) groups; **P*<0.05 vs. Control. Values are means ± SEM. | | | | | | | | |  | | | |
|  | **Supplemental Table** **S3.** List of upregulated proteins in AVE 0991 treated serum starved myotubes | | | | | | | | | | | |
|  | **Uniprot Accession** | | **Protein name** | | | | **Protein Class** | | | **Medium /Light (Average)** | | **SEM** |
|  | Q3UUB1 | | Myosin-4 | | | | G-protein modulator | | | 3.36 | | 0.53 |
|  | M0QW57 | | Junctional sarcoplasmic reticulum protein 1 | | | | Voltage-sensitive calcium channel CACNA1S regulatory protein | | | 2.52 | | 0.12 |
|  | E9PYI8 | | Ubiquitin carboxyl-terminal hydrolase 14 | | | | Peptidase C19 family | | | 2.30 | | 0.28 |
|  | D3YX34 | | Dynactin subunit 1 | | | | Non-motor microtubule binding protein | | | 2.24 | | 0.35 |
|  | D3Z600 | | Peroxisomal targeting signal 1 receptor | | | | Membrane trafficking regulatory protein | | | 2.13 | | 0.39 |
|  | Q5EBI8 | | ATP synthase subunit e, mitochondrial | | | | ATPase e subunit famiy | | | 2.09 | | 0.25 |
|  | CD47 | | Leukocyte surface antigen CD47 | | | | Immunoglobulin receptor superfamily | | | 1.81 | | 0.17 |
|  | Q8R2V4 | | Eukaryotic translation initiation factor 4 gamma 1 | | | | Translation initiation factor | | | 1.79 | | 0.08 |
|  | Q8C605 | | 6-phosphofructokinase type C | | | | Carbohydrate kinase | | | 1.68 | | 0.06 |
|  | P61971 | | Nuclear transport factor 2 | | | | Nuclear importer | | | 1.59 | | 0.21 |
|  | Q9CPN8 | | Insulin-like growth factor 2 mRNA-binding protein 3 | | | | mRNA splicing factor | | | 1.57 | | 0.17 |
|  | Q7TPQ7 | | Serine/threonine-protein phosphatase 2A 55 kDa regulatory subunit B alpha isoform | | | | Protein phosphatase | | | 1.55 | | 0.22 |
|  | P55264 | | Adenosine kinase | | | | Carbohydrate kinase | | | 1.47 | | 0.12 |
|  | E0CZA1 | | T-complex protein 1 subunit epsilon | | | | Chaperonin | | | 1.45 | | 0.06 |
|  | Q3UE86 | | Neutral alpha-glucosidase AB | | | | Glucosidase | | | 1.43 | | 0.10 |
|  | F6UFG6 | | Acidic leucine-rich nuclear phosphoprotein 32 family member A | | | | Phosphatase inhibitor | | | 1.42 | | 0.19 |
|  | Q9D892 | | Inosine triphosphate pyrophosphatase | | | | Nucleotide phosphatase | | | 1.38 | | 0.28 |
|  | G5E8Y6 | | EH domain-binding protein 1-like protein 1 | | | | Non-motor actin binding protein | | | 1.36 | | 0.10 |
|  | P61750 | | ADP-ribosylation factor 4 | | | | Small GTPase | | | 1.36 | | 0.08 |
|  | H3BKW0 | | Cleavage and polyadenylation specificity factor subunit 6 | | | | RNA binding protein | | | 1.35 | | 0.08 |
|  | Q5SV64 | | Myosin-10 | | | | G-protein modulator | | | 1.34 | | 0.04 |
|  | Q8BPW9 | | Aspartyl aminopeptidase | | | | G-protein modulator | | | 1.32 | | 0.13 |
|  | **Supplemental Table S4.** List of down regulated proteins in AVE 0991 treated serum starved myotubes | | | | | | | | | |  | |
|  | **Uniprot Accession** | **Protein name** | | | | | **Protein Class** | | | **Medium /Light (Average)** | **SEM** | |
|  | D3YWH3 | V-type proton ATPase catalytic subunit A | | | | | ATP synthase; anion channel; ligand-gated ion channel | | | 0.07 | 0.05 | |
|  | Q61263 | Sterol O-acyltransferase 1 | | | | | Acyltransferase | | | 0.59 | 0.16 | |
|  | Q3UGT9 | Beta-parvin | | | | | Actin and actin related protein | | | 0.67 | 0.10 | |
|  | Q60931 | Voltage-dependent anion-selective channel protein 3 | | | | | Anion channel; voltage-gated ion channel | | | 0.72 | 0.07 | |
|  | O70492 | Sorting nexin-3 | | | | | Membrane trafficking regulatory protein | | | 0.73 | 0.06 | |
|  | B1AR28 | Very long-chain specific acyl-CoA dehydrogenase, mitochondrial | | | | | Transferase; dehydrogenase; oxidase | | | 0.77 | 0.06 | |
|  | Q91Y95 | Thioredoxin reductase 3 | | | | | Dehydrogenase; oxidase; reductase | | | 0.77 | 0.08 | |
|  | Q91YK1 | Calcium-binding mitochondrial carrier protein | | | | | Amino acid transporter; mitochondrial carrier protein; calmodulin | | | 0.79 | 0.09 | |
|  | D3YYT0 | Cadherin-2 | | | | | Cell junction protein; cadherin | | | 0.81 | 0.03 | |
|  | Q9DBL1 | Short/branched chain specific acyl-CoA dehydrogenase, mitochondrial | | | | | Transferase; dehydrogenase; oxidase | | | 0.81 | 0.05 | |
|  | F7C957 | PDZ and LIM domain protein 2 | | | | | Transcription factor; non-motor actin binding protein | | | 0.81 | 0.02 | |
|  | Q8BKC5 | Importin-5 | | | | | Transporter; transfer/carrier protein; G-protein modulator | | | 0.82 | 0.03 | |
|  | F6QA74 | DNA-(apurinic or apyrimidinic site) lyase | | | | | AP Endonuclease | | | 0.82 | 0.04 | |
|  | F6ZSB7 | D-3-phosphoglycerate dehydrogenase | | | | | Dehydrogenase | | | 0.83 | 0.03 | |
|  | D3YUT3 | Active regulator of SIRT1 | | | | | Binding protein | | | 0.83 | 0.05 | |
|  | Q99LK5 | Thimet oligopeptidase | | | | | Metalloprotease; metalloprotease | | | 0.83 | 0.03 | |
|  | Q60932 | Voltage-dependent anion-selective channel protein 1 | | | | | Anion channel; voltage-gated ion channel | | | 0.84 | 0.09 | |
|  | Q9DC51 | Guanine nucleotide-binding protein G(k) subunit alpha | | | | | Heterotrimeric G-protein | | | 0.84 | 0.05 | |
